# Supplementary material for: Hierarchical porous Ni, Fe-codoped Co-hydroxide arrays derived from metal–organic-frameworks for enhanced oxygen evolution
Source: Royal Society of Chemistry journal article supplement (doi:10.1039/d0cc07177c), 2020-12-22
Supplement: d0cc07177c1.pdf [file d0cc07177c1.pdf]

## Electronic Supplementary Information (ESI) for

### Hierarchical porous Ni, Fe-codoped Co-hydroxide arrays derived from metal-organic-framework for Enhanced Oxygen Evolution

Qian Ren, Jin-Qi Wu, Cheng-Fei Li, Lin-Fei Gu, Ling-Jie Xie, Yu Wang, Gao-Ren Li\*

*MOE Key Laboratory of Bioinorganic and Synthetic Chemistry, School of Chemistry, Sun Yat-Sen University, Guangzhou 510275, China.*

#### Materials and Methods

Cobalt(II) nitrate hexahydrate ( $\text{Co}(\text{NO}_3)_2 \cdot 6\text{H}_2\text{O}$ , 99.99%), Iron(II) chloride tetrahydrate ( $\text{FeCl}_2 \cdot 4\text{H}_2\text{O}$ , 99.95%), Zinc(II) nitrate hexahydrate ( $\text{Zn}(\text{NO}_3)_2 \cdot 6\text{H}_2\text{O}$ , 99%), 1,3,5-benzenetricarboxylic acid ( $\text{C}_6\text{H}_3(\text{CO}_2\text{H})_3$ , 98%), Sodium hydroxide (NaOH, 96%), Potassium hydroxide (KOH, 95%), Deionized (DI) water from a Millipore system (18.2 M $\Omega$  cm) was used for solution. Ni foam with a thickness of 0.3 mm was used. All chemical reagents used in this work were analytical grade (AR) with no further processing.

#### Synthesis of BTC-Co/NF.

The Ni foam (NF) ( $3 \times 3 \times 0.1 \text{ cm}^2$ ) was rinsed with ethanol to remove surface impurities, and then immersed in the hydrochloric acid (3 M HCl) solution to remove oxidized nickel on surface, the obtained NF was washed repeatedly with distilled water. 80 mg of 1,3,5-Benzenetricarboxylic acid ( $\text{H}_3\text{BTC}$ ) and 45 mg of NaOH were dissolved in 15 mL of deionized water to obtain a colorless solution (A solution), 0.8 mmol of  $\text{Co}(\text{NO}_3)_2 \cdot 6\text{H}_2\text{O}$  was dissolved in other 10 mL of deionized water to obtain a pink solution (B solution). And then, A solution was added in B solution under continuous stirring to obtain a homogeneous solution. The above mixture solution and a piece of preprocessed NF were transferred to a Teflon-lined stainless-steel autoclave and maintained at 180 °C for 6 h. The purple BTC-Co on Ni foam

(named as BTC-Co/NF) was gained and washed with ethanol and distilled water for several times, dried at 60 °C.

#### **Synthesis of BTC-CoZn/NF.**

The preparation method is the same as the BTC-Co/NF procedure, except for replace 0.8 mmol of  $\text{Co}(\text{NO}_3)_2 \cdot 6\text{H}_2\text{O}$  with 0.6 mmol of  $\text{Co}(\text{NO}_3)_2 \cdot 6\text{H}_2\text{O}$  and 0.2 mmol of  $\text{Zn}(\text{NO}_3)_2 \cdot 6\text{H}_2\text{O}$ .

#### **Synthesis of BTC-CoZnFeNi/NF.**

The preparation method is the same as the BTC-Co/NF procedure, except for replace 0.8 mmol of  $\text{Co}(\text{NO}_3)_2 \cdot 6\text{H}_2\text{O}$  with 0.4 mmol of  $\text{Co}(\text{NO}_3)_2 \cdot 6\text{H}_2\text{O}$ , 0.2 mmol of  $\text{Zn}(\text{NO}_3)_2 \cdot 6\text{H}_2\text{O}$  and 0.2 mmol of  $\text{FeCl}_2 \cdot 4\text{H}_2\text{O}$ . Due to the acidity of  $\text{FeCl}_2$  solution, under hydrothermal conditions, nickel foam was corroded resulting in Ni dissolution and doping into the product.

#### **Synthesis of Co-H NAs/NF.**

An electrochemical method was used to remove the ligand. The cyclic voltammetry (CV) mode with a fixed potential window of 0.925~1.475 V (vs. RHE) was performed in 1.0 M KOH, the scan rate is 10  $\text{mV s}^{-1}$ . The BTC-CoZn/NF as precursor, after continuous CV cycle (10, 30, 50, and 100 cycles), the BTC-CoZn evolved into cobalt hydroxide. After 100 cycles, the final product was collected and labelled as Co-H NAs/NF.

#### **Synthesis of $\text{Ni}_{0.8}\text{Fe}_{0.2}$ /Co-H NAs/NF.**

The preparation method is the same as the Co-H/NF procedure, except for replace the precursor BTC-CoZn/NF with BTC-CoZnFeNi/NF, the final product was collected and labelled as  $\text{Ni}_{0.8}\text{Fe}_{0.2}$ /Co-H NAs/NF, the ICP-AES data shows the molar ratio of Ni Fe is 0.8:0.2.

#### **Characterizations**

X-ray diffraction (PXRD) patterns were recorded on a Rigaku D/Max 2550 X-ray diffractometer with a

Cu K $\alpha$  radiation (40 kV-40 mA). The surface morphologies of the products were characterized by Zeiss Sigma field emission scanning electron microscope (FE-SEM, Quanta 400FEG). The inner structures were characterized by transmission electron microscope (TEM, JEM-2010HR). The High-resolution TEM and Energy-dispersive X-ray spectroscopy (EDX) analysis were carried out on JEM-3010HR. Atomic force microscopy (AFM) images were performed by a SHIMDZU SPM-9500J3 device. The valence state analysis of the products was obtained by X-Ray photoelectron spectroscopy (XPS) using an ESCALAB 250 X-Ray photoelectron spectrometer, and all the XPS spectra peaks were corrected by C 1s line at 284.8 eV as standard. Molecular groups analysis of samples was determined by Fourier transform infrared (FTIR) spectra (Renishaw inVia). The inductively coupled plasma-atomic emission spectrometry (ICP-AES) was carried out on TJA IRIS (HR) spectrometer.

### **Electrochemical Measurements**

All electrocatalysts measurements were acquired in a typical three-electrode configuration in the O<sub>2</sub>-saturated solution at room temperature on a CHI 660D Electrochemical Workstation. In all electrochemical measurements, the as-prepared catalysts on NF were used as the working electrode (the area in the submerged electrolyte is 0.2 cm  $\times$  0.5 cm  $\times$  2), carbon rod as the counter electrode, and a Hg/HgO (1.0 M KOH) electrode as reference electrode. All potentials measured were converted to the reversible hydrogen electrode (RHE) adopting the following equation:  $E_{\text{RHE}} (\text{V}) = E_{\text{Hg/HgO}} (\text{V}) + 0.098 \text{ V} + 0.059 \text{ pH}$ . The overpotential ( $\eta$ ) was calculated from the formula:  $\eta = E_{\text{RHE}} - 1.23 \text{ V}$ . The linear sweep voltammetry (LSV) was performed at a scan rate of 1 mV s<sup>-1</sup> in 1.0 M KOH (pH 14) solution (the deionized water was used as solvent). All polarization curves were corrected with 95% iR-compensation. Electrochemical impedance spectroscopy (EIS) measurements were carried out at 1.524V (*vs.*RHE) in the frequency range of 100kHz~0.01Hz with 5 mV sinusoidal perturbations. Chronopotentiostatic

curves were recorded at a constant current density of  $10 \text{ mA cm}^{-2}$ . The double-layer capacitance ( $C_{dl}$ ) via cyclic voltammograms (CV) at different scan rates of  $10\text{-}50 \text{ mV s}^{-1}$  were measured to estimate electrochemically active surface area (ECSA).

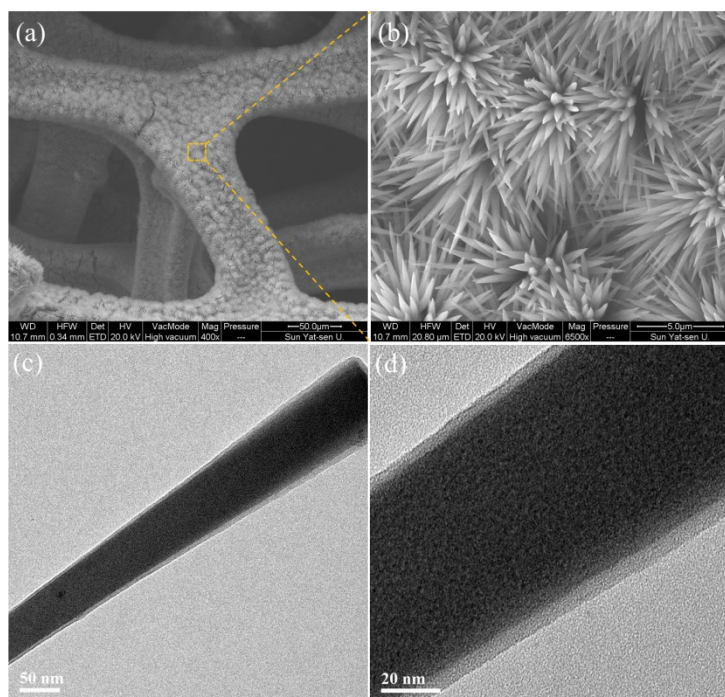

**Fig. S1** (a,b) SEM images and (c,d) TEM images of BTC-Co/NF.

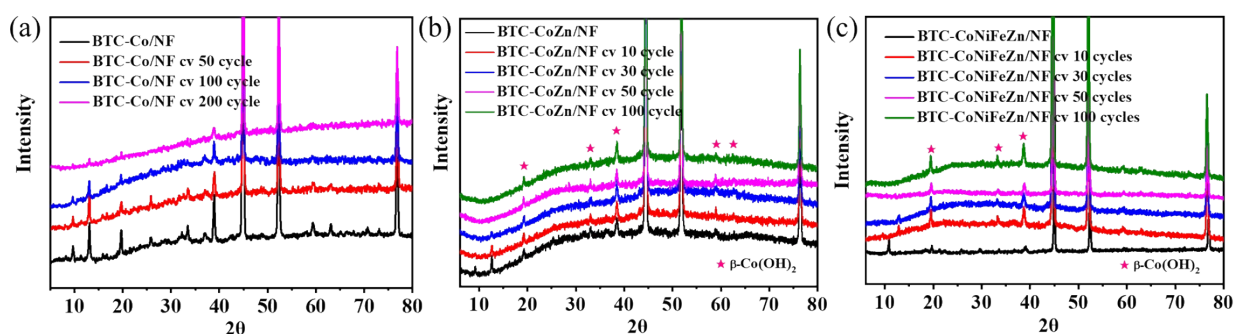

**Fig. S2** XRD patterns of (a) BTC-Co/NF, (b) BTC-CoZn/NF, and (c) BTC-CoNiFeZn/NF before and after different CV treatments with a fixed potential window of  $0.925\text{--}1.475 \text{ V}$  (*vs.* RHE) in  $1.0 \text{ M KOH}$ .

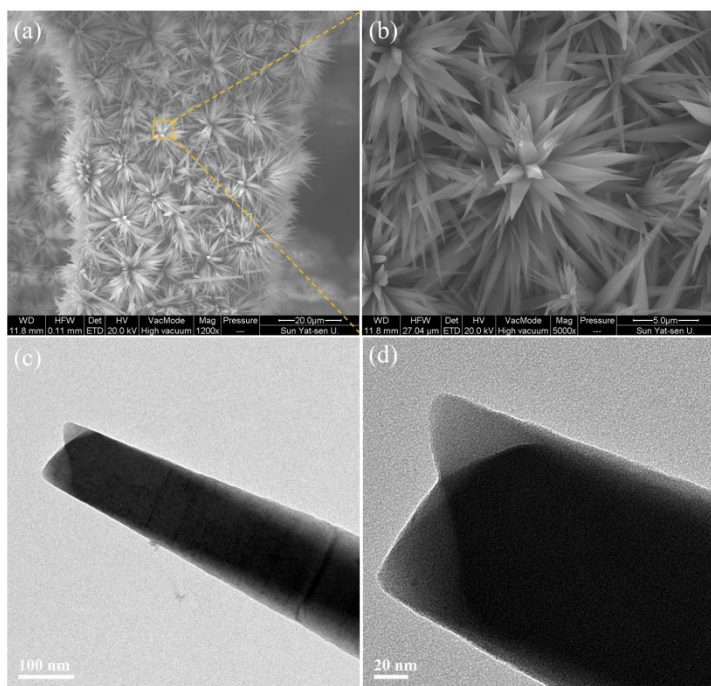

**Fig. S3** (a,b) SEM images and (c,d) TEM images of BTC-CoZn/NF.

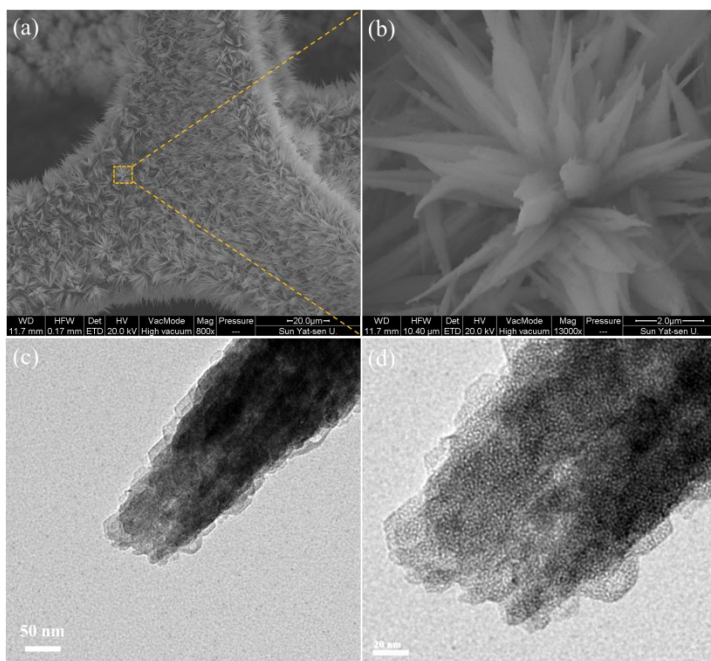

**Fig. S4** (a,b) SEM images and (c,d) TEM images of Co-H NAs/NF.

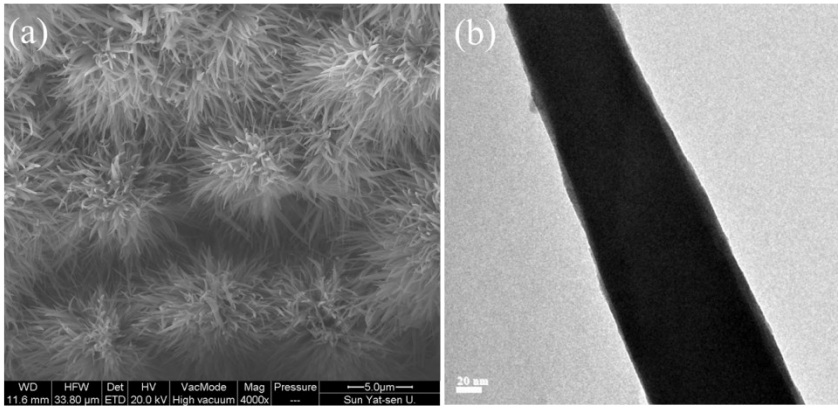

**Fig. S5** SEM and TEM images of BTC-CoZnFeNi/NF.

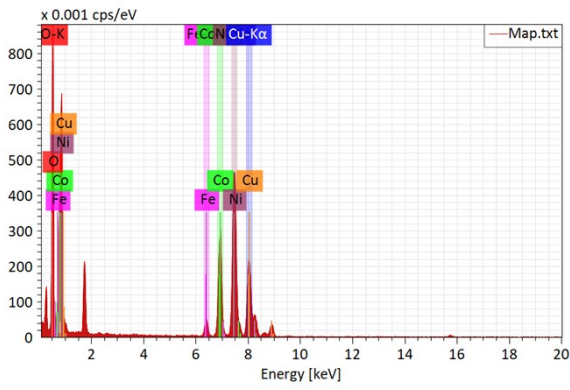

**Fig. S6** EDXS spectrum of  $\text{Ni}_{0.8}\text{Fe}_{0.2}/\text{Co-H NAs/NF}$  separated from Ni foam.

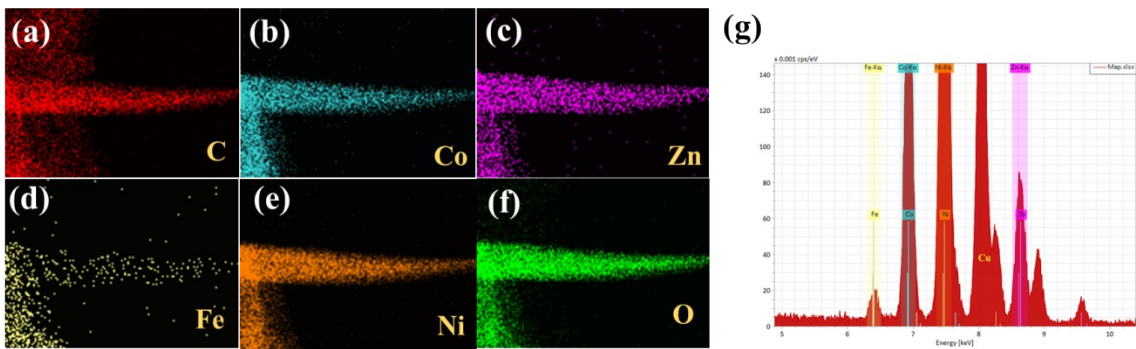

**Fig. S7** EDX element mapping images and energy spectrum of BTC-CoNiFeZn/NF.

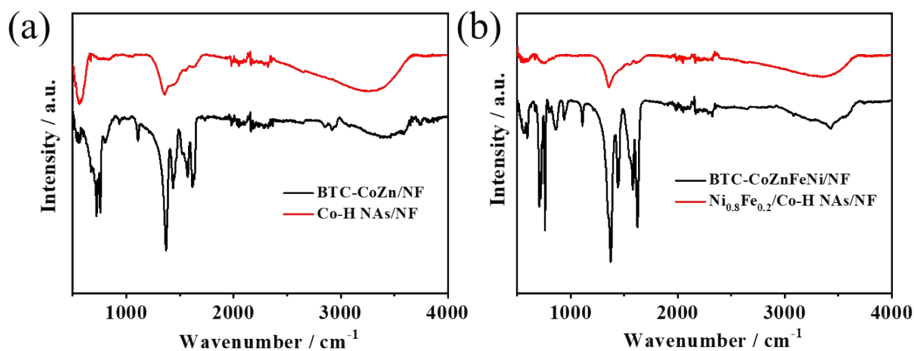

**Fig. S8** FTIR of (a) BTC-CoZn and Co-H NAs/NF, (b) BTC-CoNiFeZn and Ni<sub>0.8</sub>Fe<sub>0.2</sub>/Co-H NAs/NF.

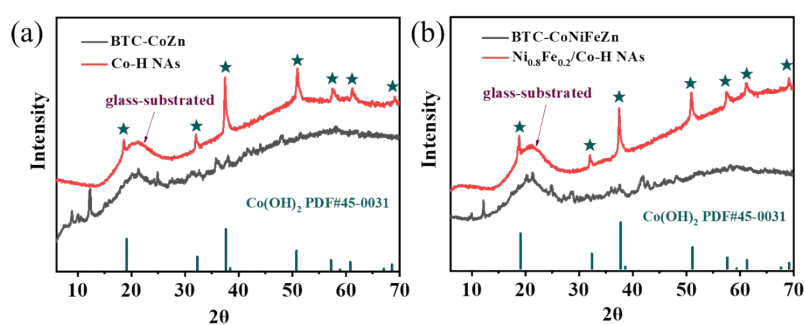

**Fig. S9** XRD patterns of (a) BTC-CoZn, Co-H NAs, and (b) BTC-CoNiFeZn, Ni<sub>0.8</sub>Fe<sub>0.2</sub>/Co-H NAs that were collected from the surface of NF by ultrasound.

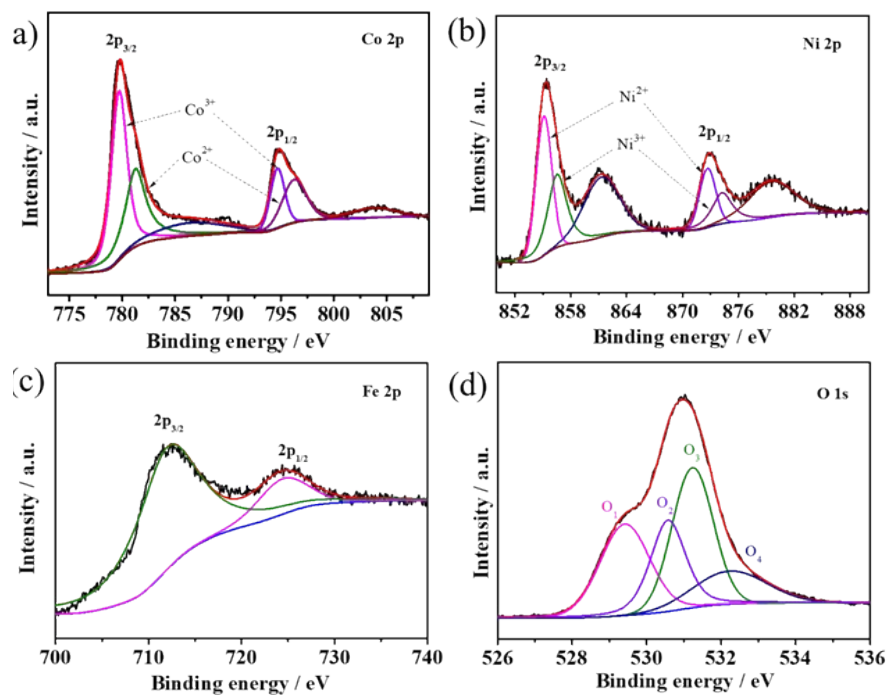

**Fig. S10** High-resolution XPS spectra of Ni 2p, Co 2p, Fe 2p and O 1s of Ni<sub>0.8</sub>Fe<sub>0.2</sub>/Co-H NAs/NF.

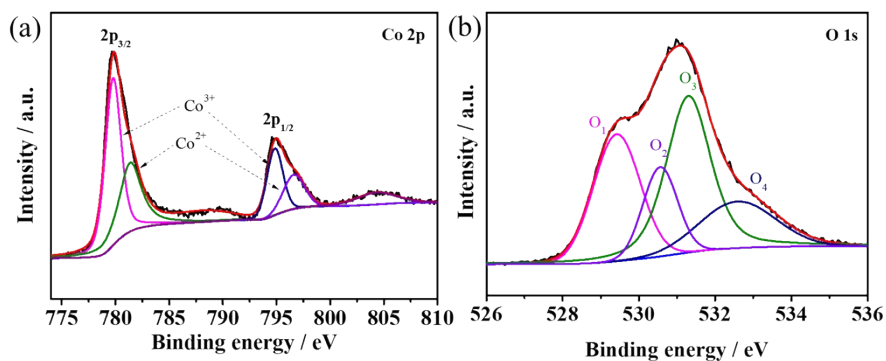

**Fig. S11** High-resolution (a) Co 2p and (b) O1s XPS spectra of Co-H NAs/NF.

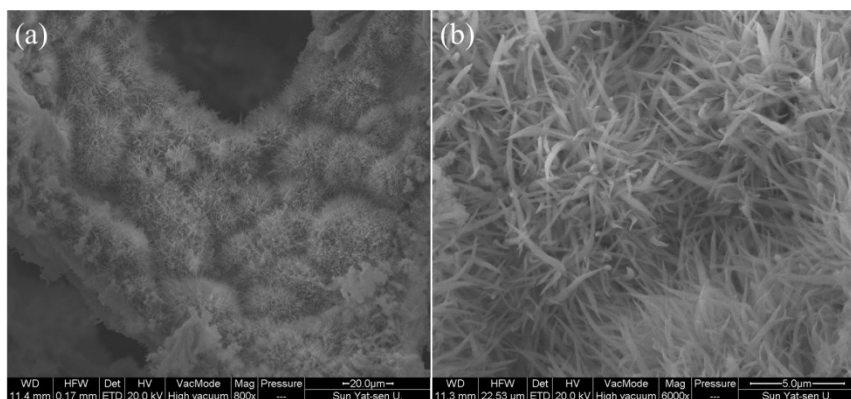

**Fig.S12** SEM images of  $\text{Ni}_{0.8}\text{Fe}_{0.2}/\text{Co-H NAs/NF}$  after 135 h OER test in 1.0 M KOH solution.

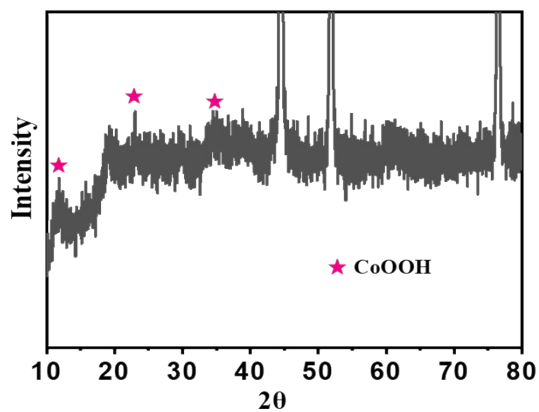

**Fig. S13** XRD pattern of  $\text{Ni}_{0.8}\text{Fe}_{0.2}/\text{Co-H NAs/NF}$  after 135 h OER test in 1.0 M KOH solution.



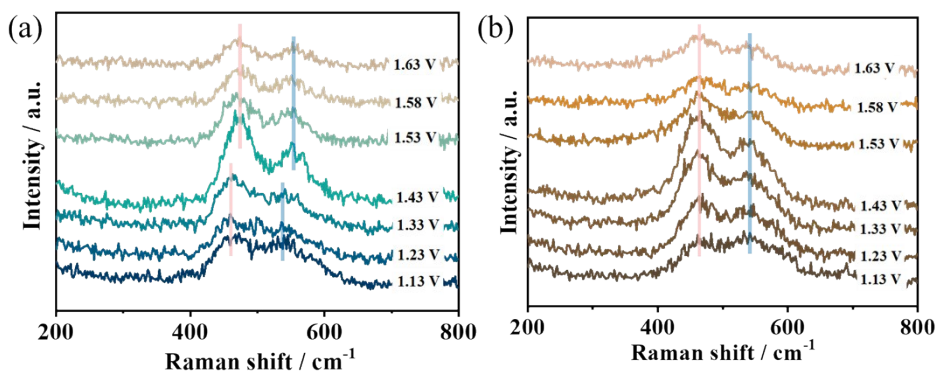

**Fig. S14** In-situ Raman spectra of (a) Co-H NAs/NF and (b) Ni<sub>0.8</sub>Fe<sub>0.2</sub>/Co-H NAs/NF. The data were obtained in 0.1 M KOH used custom made teflon electrolyzer at applied potential from 1.13 to 1.63 V.

The relative strength ( $I_{465}/I_{537}$ ) increases with the increasing of OER voltage, indicating the formation of oxy-hydroxide during OER tests, which is considered to be the formation of active site of Co, Ni-based catalysts.<sup>S1,S2</sup>

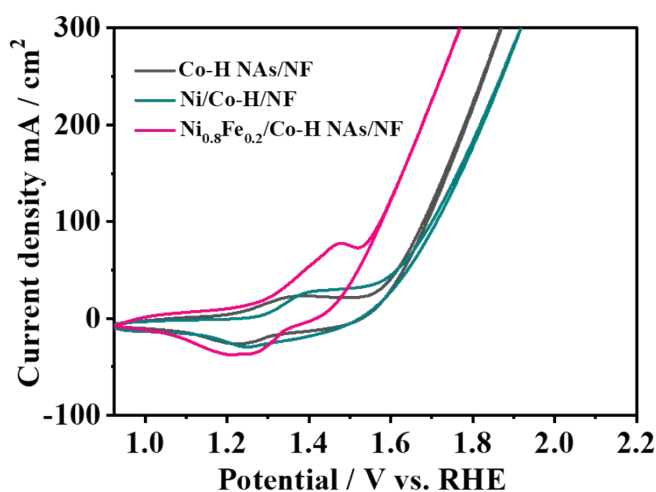

**Fig. S15** CV curves of Co-H NAs/NF, Ni/Co-H/NF and Ni<sub>0.8</sub>Fe<sub>0.2</sub>/Co-H NAs/NF in 1M KOH at 10 mV/s. Ni/Co-H/NF: the preparation method is the same as Co-H NAs/NF except that Ni(NO<sub>3</sub>)<sub>2</sub>+Co(NO<sub>3</sub>)<sub>2</sub> (1:1) replaces Co(NO<sub>3</sub>)<sub>2</sub>.

The CV curves show that the redox peak of M (Co, Ni) shifts anodically after Fe dopants, and this phenomenon indicates a strong electronic interaction between M and Fe, which will further promote OER performance.<sup>S3,S4</sup>

**Table S1.** The summary of transition based electrocatalysts for OER.

| MOFs types                                                                   | Substrate | Electrolyte | $\eta_{/x \text{ mA cm}^{-2}}$<br>/mV    | Tafel slope<br>/ mV deg <sup>-1</sup> | Refs      |
|------------------------------------------------------------------------------|-----------|-------------|------------------------------------------|---------------------------------------|-----------|
| Co-H NAs                                                                     | NF        | 1.0 M KOH   | 293 <sub>/20</sub>                       | 58.1                                  | This work |
| Ni <sub>0.8</sub> Fe <sub>0.2</sub> /Co-H NAs                                | NF        | 1.0 M KOH   | 247 <sub>/20</sub><br>231 <sub>/10</sub> | 34.2                                  | This work |
| FeCo-oxyhydroxides                                                           | NF        | 1.0 M KOH   | 331 <sub>/10</sub>                       | 42                                    | [S5]      |
| Co-Fe PBAs-250                                                               | GCE       | 1.0 M KOH   | 237 <sub>/10</sub>                       | 59.7                                  | [S6]      |
| CoFe-MOF-OH                                                                  | GCE       | 1.0 M KOH   | 265 <sub>/10</sub>                       | 44                                    | [S7]      |
| NiCo-UMOFNs                                                                  | GCE       | 1.0 M KOH   | 250 <sub>/10</sub>                       | 42                                    | [S8]      |
| Cr-CoFe LDHs                                                                 | NF        | 1.0 M KOH   | 238 <sub>/10</sub>                       | 107                                   | [S9]      |
| Ni <sub>0.75</sub> Fe <sub>0.25</sub> (OH) <sub>x</sub>                      | GCE       | 1.0 M KOH   | 310 <sub>/10</sub>                       | 68                                    | [S10]     |
| (Ni <sub>2</sub> Co <sub>1</sub> ) <sub>0.925</sub> Fe <sub>0.075</sub> -MOF | NF        | 1.0 M KOH   | 257 <sub>/10</sub>                       | 41.3                                  | [S11]     |
| MIL-53(FeNi)                                                                 | NF        | 1.0 M KOH   | 233 <sub>/10</sub>                       | 31.4                                  | [S12]     |
| CoFe(OH) <sub>x</sub>                                                        | GCE       | 1.0 M KOH   | 293 <sub>/10</sub>                       | 67.4                                  | [S13]     |
| Fe/Ni-BTC                                                                    | NF        | 0.1 M KOH   | 270 <sub>/10</sub>                       | 47                                    | [S14]     |
| aMOF-NC                                                                      | GCE       | 1.0 M KOH   | 249 <sub>/10</sub>                       | 39.5                                  | [S15]     |
| LS-6%-NiFe-MOFs                                                              | GCE       | 1.0 M KOH   | 230 <sub>/10</sub>                       | 86.6                                  | [S16]     |
| Co <sub>0.5</sub> Fe <sub>0.5</sub> OOH                                      | NF        | 1.0 M KOH   | 220 <sub>/10</sub>                       | 38.2                                  | [S17]     |
| 2D NiFe-MOF                                                                  | NF        | 0.1 M KOH   | 240 <sub>/10</sub>                       | 34                                    | [S18]     |
| Co-MOF                                                                       | NF        | 1.0 M KOH   | 311 <sub>/10</sub>                       | 77                                    | [S19]     |
| Fe <sub>0.33</sub> Co <sub>0.67</sub> OOH                                    | CFC       | 1.0 M KOH   | 266 <sub>/10</sub>                       | 30                                    | [S20]     |
| Ni <sub>5</sub> Fe LDH                                                       | NF        | 1.0 M KOH   | 220 <sub>/10</sub>                       | 59                                    | [S21]     |

GCE: Glassy carbon electrode; NF: Nickel foam; CFC: Carbon fiber cloth.

## References

- [S1] Z. C. Kuang, S. Liu, X. N Li, M. Wang, X. Y. Ren, J. Ding, R. L. Ge, W. H. Zhou, A. I. Rykov, M. T. Sougrati, P. E. Lippens, Y. Q. Huang, J. H. Wang, *J. Energy Chem.*, 2021, 57, 212.

- [S2] S. Lee, K. Banjac, M. Lingenfelder, X. L. Hu, *Angew. Chem.*, 2019, 131, 10401.
- [S3] L. Trotochaud, S. L. Young, J. K. Ranney, S. W. Boettcher, *J. Am. Chem. Soc.*, 2014, 136, 6744.
- [S4] M. a S. Burke, M. G. Kast, L. Trotochaud, A. M. Smith, *J. Am. Chem. Soc.*, 2015, 137, 3638.
- [S5] J. Y. Tian, F. L. Jiang, D. Q. Yuan, L. J. Zhang, Q. H. Chen, M. C. Hong, *Angew. Chem. Int. Ed.*, 2020, **59**, 2.
- [S6] Q. Hu, X. W. Huang, Z. Y. Wang, G. M. Li, Z. Han, H. P. Yang, P. Liao, X. Z. Ren, Q. L. Zhang, J. H. Liu, C. X. He, *Small*, 2020, 2002210.
- [S7] Z. H. Zou, T. T. Wang, X. H. Zhao, W. J. Jiang, H. R. Pan, D. Q. Gao, C. L. Xu, *ACS Catal.*, 2019, **9**, 7356.
- [S8] S. L. Zhao, Y. Wang, J. C. Dong, C. T. He, H. J. Yin, P. F. An, K. Zhao, X. F. Zhang, C. Gao, L. J. Zhang, J. W. Lv, J. X. Wang, J. Q. Zhang, A. M. Khattak, N. A. Khan, Z. X. Wei, J. Zhang, S. Q. Liu, H. J. Zhao, Z. Y. Tang, *Nat. Energy*, 2016, 1, 16184.
- [S9] L. L. Wen, X. L. Zhang, J. Y. Liu, X. Y. Li, C. C. Xing, X. J. Lyu, W. P. Cai, W. C. Wang, Y. Li, *Small*, 2019, **15**, 1902373.
- [S10] T. Tian, M. Zheng, J. Q. Lin, X. Y. Meng, Y. Ding, *Chem. Commun.*, 2019, **55**, 1044.
- [S11] Q. Z. Qian, Y. P. Li, Y. Liu, L. Yu, G. Q. Zhang, *Adv. Mater.*, 2019, 1901139.
- [S12] F. Z. Sun, G. Wang, Y. Q. Ding, C. Wang, B. B. Yuan, Y. Q. Lin, *Adv. Energy Mater.*, 2018, 8, 1800584.
- [S13] X. Y. Yue, W. T. Ke, M. H. Xie, X. P. Shen, Z. Y. Yan, Z. Y. Ji, G. X. Zhu, K. Q. Xu, H. Zhou, *Catal. Sci. Technol.*, 2020, 10, 215.
- [S14] L. Wang, Y. Z. Wu, R. Cao, L. T. Ren, M. X. Chen, X. Feng, J. W. Zhou, B. Wang, *ACS Appl. Mater. Interfaces*, 2016, 8, 16736.
- [S15] C. Liu, J. Wang, J. J. Wan, Y. Cheng, R. Huang, C. Q. Zhang, W. L. Hu, G. F. Wei, C. Z. Yu, *Angew. Chem. Int. Ed.* 2020, 59, 3630.
- [S16] Q. Q. Ji, Y. Kong, C. Wang, H. Tan, H. L. Duan, W. Hu, G. N. Li, Y. Lu, N. Li, Y. Wang, J. Tian, Z. M. Qi, Z. H. Sun, F. C. Hu, W. S. Yan, *ACS Catal.* 2020, 10, 5691.
- [S17] J. Du, C. Li, X. L. Wang, X. Y. Shi, H. P. Liang, *ACS Appl. Mater. Interfaces*, 2019, **11**, 25958.
- [S18] J. J. Duan, S. Chen, C. Zhao, *Nat. Commun.*, 2017, **8**, 15341.
- [S19] X. Q. Zhang, W. D. Sun, H. T. Du, R. M. Kong, F. L. Qu, *Inorg. Chem. Front.*, 2018, **5**, 344.
- [S20] S. H. Ye, Z. X. Shi, J. X. Feng, Y. X. Tong, G. R. Li, *Angew. Chem. Int. Ed.*, 2018, **57**, 2672.
- [S21] Y. Zhang, Q. Shao, Y. Pi, J. Guo, X. Q. Huang, *small*, 2017, **13**, 1700355.
